# Supplementary material for: Machine learning prediction of malaria vaccine efficacy based on antibody profiles
Source: PubMed Central journal article supplement (PMC11189177; doi:10.1371/journal.pcbi.1012131), 2024-06-07
Supplement: pcbi.1012131.s001.pdf [file pcbi.1012131.s001.pdf]

Machine Learning Prediction of Malaria Vaccine Efficacy based on Antibody Profiles  
**Supplementary Data**

Jacqueline Wistuba-Hamprecht, Bernhard Reuter, Rolf Fendel, Stephen L. Hoffman, Joseph J.Campo, Phil L. Felgner, Peter G. Kremsner, Benjamin Mordmüller, Nico Pfeifer

| <b>SVM:</b>    | <b>Parameter</b> | from                 | to     | by  |
|----------------|------------------|----------------------|--------|-----|
| <b>Kernel</b>  |                  |                      |        |     |
| polynomial     | degree           | 2                    | 6      | 1   |
| rbf            | gamma            | $10^{-6}$            | $10^6$ | 1   |
| cost parameter | C                | $10^{-4}$            | $10^5$ | 1   |
|                |                  |                      |        |     |
| <b>RLR:</b>    |                  |                      |        |     |
|                | C                | $10^{-4}$            | $10^4$ | 1   |
|                | rho              | 0                    | 1      | 0.1 |
| <b>RF:</b>     |                  |                      |        |     |
|                | n_trees          | 100                  | 1000   | 500 |
|                | max_features     | ['sqrt', 0.1, 0.333] |        |     |

**Table A:** Parameter ranges for evaluation of the best combinations of kernels for the multitask SVM approach. Parameter ranges for the ten time repeated nested stratified 5-fold cross-validation of the RLR, RF and single-task SVM (with rbf kernel) methods.

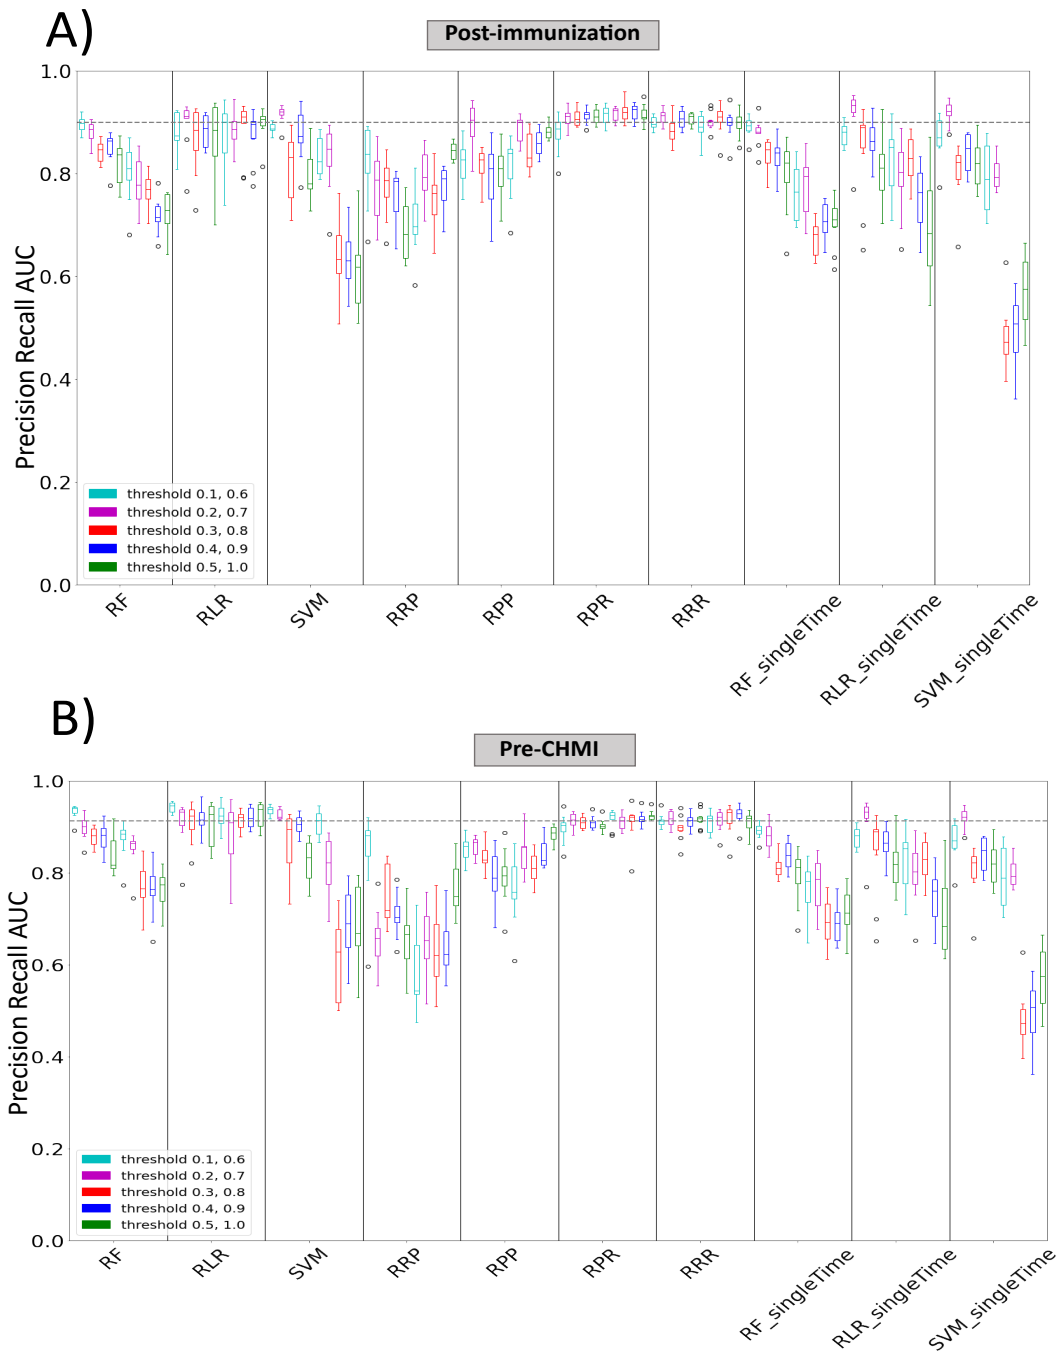

**Fig A: Performance of multitask SVM models in predicting the protection status based on the antibody reactivity profile over different Pearson correlation coefficients as compared to state-of-the-art approaches.** The PR-AUC score of the RLR, the RF, the single-task SVM (trained either on each single time point or on the combined time points), and the multitask-SVM models (using different combinations of kernel functions) for predicting the protection status based on the whole proteome antibody profile over a range of Pearson correlation coefficients from 0.1 to 1 was assessed via 10-times repeated nested stratified 5-fold cross-validation. RF, RLR and single-task SVM models trained on each time point separately are labeled by the extension 'singleTime'. The PR-AUC performance of the different applied models is shown **A**: at post-immunization (III+14) and **B**: at pre-CHMI (C-1). The multitask-SVM approach with a kernel combination of either 'RPR' or 'RRR' shows a robust PR-AUC score over the range of Pearson correlation coefficients compared to the state-of-the-art approaches at post-immunization (**A**) and at pre-CHMI (**B**). Only multi-time RLR models achieved similar prediction performances over the range of Pearson correlation coefficients, but with a higher standard deviation at post-immunization (**A**) and at pre-CHMI (**B**). The dashed line represents the mean PR-AUC over all Pearson correlation coefficients for the multitask-SVM model with the kernel combination of 'RRR'.

**A:** The mean PR-AUC score over all Pearson correlation coefficients of the multitask-SVM approach with a kernel combination of 'RRR' is 0.899 and higher than the mean PR-AUC score of the multi-time RLR approach of 0.880.

**B:** The multitask-SVM approach with a kernel combination of 'RRR' and the multi-time RLR approach achieved the same mean PR-AUC score over all Pearson correlation coefficients of 0.914.

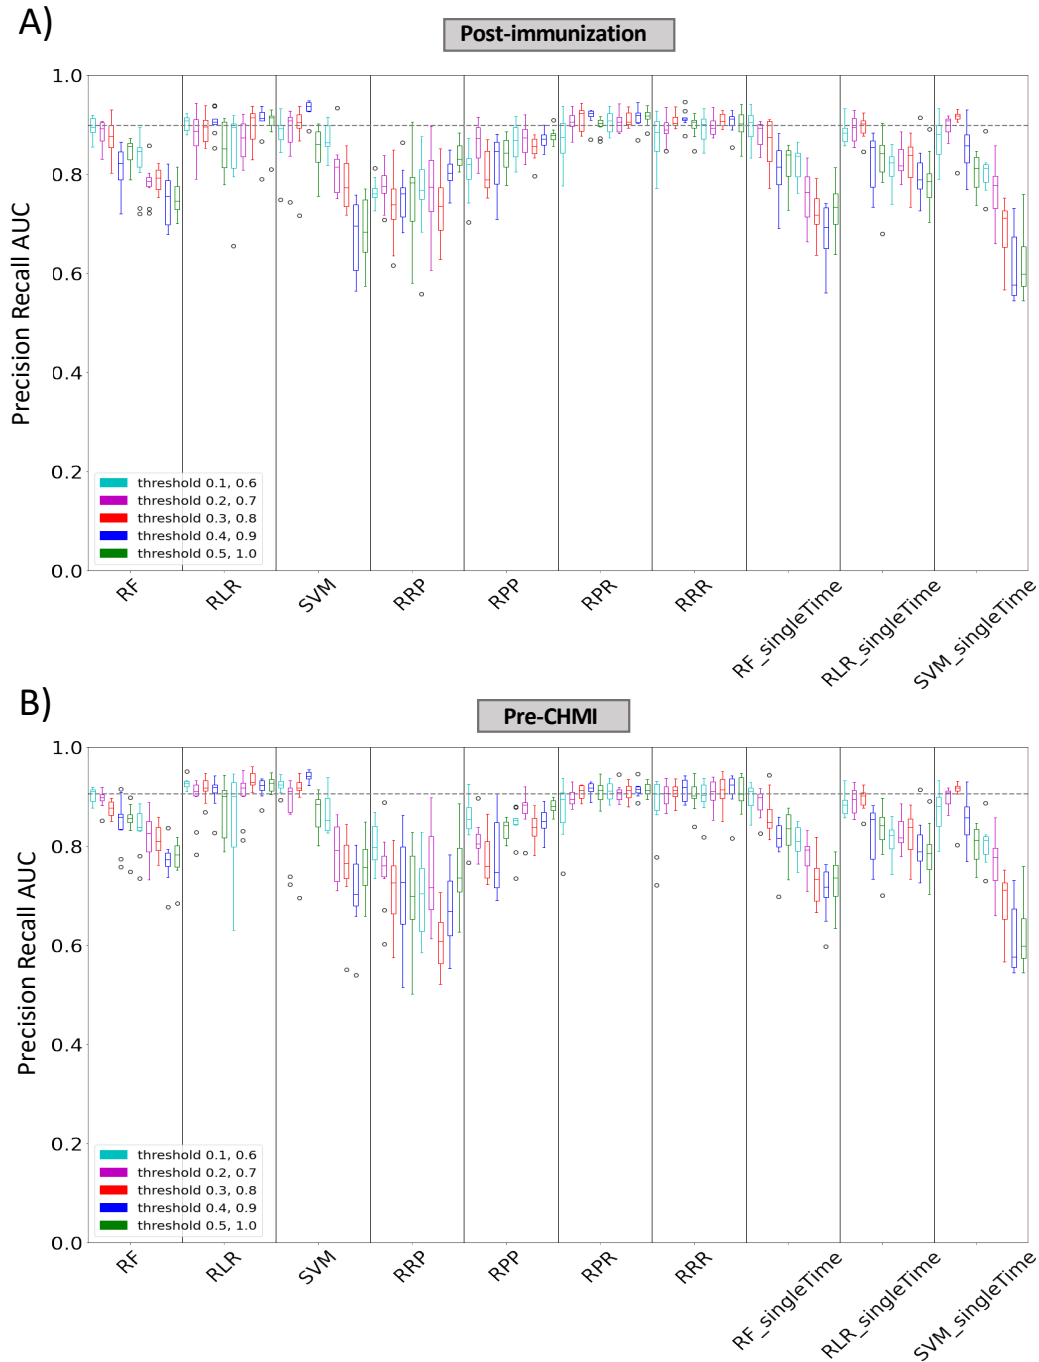

**Fig B: Performance of multitask SVM models in predicting the protection status based on cell-surface antibody reactivity profile over different Pearson correlation coefficients as compared to state-of-the-art approaches.** The PR-AUC score of the RLR, the RF, the single-task SVM (trained either on each single time point or on the combined time points), and the multitask-SVM models (using different combinations of kernel functions) for predicting the protection status based on cell-surface antibody reactivity profile over a range of Pearson correlation coefficients from 0.1 to 1 was assessed via 10-times repeated nested stratified 5-fold cross-validation. RF, RLR and single-task SVM models trained on each time point separately are labeled by the extension 'singleTime'. The PR-AUC performance of the different applied models is shown **A**: at post-immunization (III+14) and **B**: at pre-CHMI (C-1). The multitask-SVM approach with a kernel combination of either 'RPR' or 'RRR' shows a robust PR-AUC score over the range of Pearson correlation coefficients compared to the state-of-the-art approaches at post-immunization (**A**) and at pre-CHMI (**B**). Only multi-time RLR achieved similar prediction performances over the range of Pearson correlation coefficients, but with a higher standard deviation at post-immunization (**A**) and at pre-CHMI (**B**). The dashed line represents the mean PR-AUC score over all Pearson correlation coefficients for the multitask-SVM model with the kernel combination of 'RRR'.

**A:** The mean PR-AUC score over all Pearson correlation coefficients of the multitask-SVM approach with a kernel combination of 'RRR' is 0.898 and higher than the mean PR-AUC score of the multi-time RLR approach of 0.885.

**B:** The mean PR-AUC score over all Pearson correlation coefficients of the multitask-SVM approach with a kernel combination of 'RRR' is 0.905 and disproportionately lower than the mean PR-AUC score of the multi-time RLR approach of 0.906.

| Data Set                                                       | Time Point                 | Combination of kernel functions for time-series, Pf-SPZ dose and Ab signal intensities | Combination of kernel parameter            | mean PR-AUC score +/- std |
|----------------------------------------------------------------|----------------------------|----------------------------------------------------------------------------------------|--------------------------------------------|---------------------------|
| Whole proteome data (m=40 samples, p=7,455 features)           | III+14 (post-immunization) | RRR                                                                                    | R0: 0.1<br>R1: 0.01<br>R2: 1e-06<br>C: 1.0 | 0.927<br>+/- 0.009        |
| Whole proteome data (m=40 samples, p=7,455 features)           | C-1 (pre-CHMI)             | RRR                                                                                    | R0: 0.1<br>R1: 0.1<br>R2: 1e-05<br>C: 0.1  | 0.943<br>+/- 0.006        |
| Selective set of cell-surface antigens (m=40, p=1194 features) | III+14 (post-immunization) | RRR                                                                                    | R0: 1.0<br>R1: 0.1<br>R2: 1e-05<br>C: 1.0  | 0.932<br>+/- 0.013        |
| Selective set of cell-surface antigens (m=40, p=1194 features) | C-1 (pre-CHMI)             | RRR                                                                                    | R0: 0.1<br>R1: 0.1<br>R2: 1e-05<br>C: 0.1  | 0.942<br>+/- 0.011        |
| Whole proteome data (m=40 samples, p=7,455 features)           | III+14 (post-immunization) | RPR                                                                                    | R0: 1.0<br>P1: 3<br>R2: 1e-05<br>C: 0.01   | 0.0929<br>+/- 0.009       |
| Whole proteome data (m=40 samples, p=7,455 features)           | C-1 (pre-CHMI)             | RPR                                                                                    | R0: 10<br>P1: 2<br>R2: 1e-05<br>C: 0.01    | 0.936<br>+/-0.009         |
| Selective set of cell-surface antigens (m=40, p=1194 features) | III+14 (post-immunization) | RPR                                                                                    | R0: 1e-06<br>P1:2<br>R2: 1e-05<br>C:0.1    | 0.936<br>+/- 0.006        |
| Selective set of cell-surface antigens (m=40, p=1194 features) | C-1 (pre-CHMI)             | RPR                                                                                    | R0: 0.01<br>P1: 2<br>R2: 1e-05<br>C: 0.01  | 0.933<br>+/- 0.016        |

**Table B: Performance results of 10 times repeated 5-fold grid search CV for different combination of kernel combination and their parameter setting of the multitask SVM based on the whole and selective set of cell-surface antibody reactivity profile per time point.** To evaluate the best prediction performances (PR-AUC) for the different kernel combinations for the kernel parameter ranges from **S1 Table** a 10 time repeated 5-fold grid search CV on the whole antibody reactivity profile and the pre-selected cell-surface antigens from immunized and non-immunized individuals were performed. The table shows the kernel combinations and their parameter setting which resulted in the highest mean PR-AUC per time point. R0 represents the gamma value of the rbf kernel function for the time series, R1 or P1 represents either the value of the rbf kernel function or the polynomial kernel function for the Pf-SPZ dose and R2 for the antibody signal intensity. Based on the highest mean PR-AUC value of the kernel combination per time point (III+14 or C-1), the kernel parameter combination 'RRR' was used to evaluate the ESPY value for each feature in the multitask-SVM classification of protected immunized and non-protected immunized/non-immunized individuals based on the whole and selective cell-surface antigen antibody reactivity profile.

| Plasmodb ID   | effect | ESPY value<br>([d_norm]) | Description                                                 |
|---------------|--------|--------------------------|-------------------------------------------------------------|
| PFSPZ dosis   | +      | 6.26E-01                 | PFSPZ dosis                                                 |
| PF3D7_1123200 | +      | 1.45E-03                 | leucine-rich repeat protein                                 |
| PF3D7_0210200 | +      | 1.03E-03                 | conserved Plasmodium protein, unknown function              |
| PF3D7_0628100 | +      | 9.49E-04                 | HECT domain-containing protein 1, putative                  |
| PF3D7_0526200 | +      | 9.32E-04                 | ADP-ribosylation factor GTPase-activating protein, putative |
| PF3D7_1138400 | +      | 7.29E-04                 | guanylyl cyclase (GCalpha)                                  |
| PF3D7_0815500 | +      | 7.17E-04                 | conserved Plasmodium protein, unknown function              |
| PF3D7_1032900 | +      | 6.51E-04                 | RNA polymerase II-associated protein 1, putative            |
| PF3D7_0902200 | +      | 5.91E-04                 | serine/threonine protein kinase, FIKK family (FIKK9.3)      |
| PF3D7_1364400 | +      | 5.20E-04                 | conserved Plasmodium protein, unknown function              |
| PF3D7_1332900 | +      | 5.19E-04                 | isoleucine-tRNA ligase, putative                            |
| PF3D7_1008000 | +      | 5.08E-04                 | histone deacetylase 2                                       |
| PF3D7_0804500 | +      | 4.85E-04                 | conserved Plasmodium membrane protein, unknown function     |
| PF3D7_1227200 | +      | 4.74E-04                 | potassium channel K1                                        |
| PF3D7_1329500 | +      | 4.67E-04                 | conserved Plasmodium protein, unknown function              |
| PF3D7_1243900 | +      | 4.58E-04                 | double C2-like domain-containing protein                    |
| PF3D7_0807100 | +      | 4.29E-04                 | DNA helicase PSH3                                           |
| PFC0210c      | +      | 3.91E-04                 | circumsporozoite (CS) protein (CSP)                         |
| PF3D7_0324900 | +      | 3.76E-04                 | erythrocyte membrane protein 1, PfEMP1                      |
| PFB0300c      | +      | 3.59E-04                 | merozoite surface protein 2                                 |
| PF3D7_0712300 | +      | 3.50E-04                 | erythrocyte membrane protein 1, PfEMP1                      |
| PF3D7_1328200 | +      | 3.28E-04                 | BRCA2 protein, putative                                     |
| PF3D7_1137300 | +      | 3.28E-04                 | CLPTM1 domain-containing protein, putative                  |
| PF3D7_1472100 | +      | 3.23E-04                 | protein transport protein YIP1, putative                    |
| PF3D7_1215900 | +      | 3.21E-04                 | serpentine receptor 10                                      |
| PF3D7_0207000 | +      | 3.19E-04                 | merozoite surface protein 4 (MSP4)                          |
| PF3D7_1329500 | -      | 1.33E-03                 | conserved Plasmodium protein, unknown function              |
| PF3D7_0715300 | -      | 1.33E-03                 | calcium/calmodulin-dependent protein kinase, putative       |
| PF3D7_1477500 | -      | 1.35E-03                 | Plasmodium exported protein (PHISTb), unknown function      |
| PF3D7_1402400 | -      | 1.36E-03                 | zinc finger protein, putative                               |
| PF3D7_1221500 | -      | 1.36E-03                 | heptatricopeptide repeat-containing protein, putative       |
| PF3D7_1449800 | -      | 1.37E-03                 | conserved Plasmodium protein, unknown function              |
| PF3D7_0223300 | -      | 1.39E-03                 | erythrocyte membrane protein 1 (PfEMP1) exon 2              |
| PF3D7_0711700 | -      | 1.40E-03                 | erythrocyte membrane protein 1, PfEMP1                      |
| PF3D7_1360400 | -      | 1.44E-03                 | conserved Plasmodium protein, unknown function              |
| PF3D7_1468300 | -      | 1.44E-03                 | leucine-rich repeat protein                                 |
| PF3D7_1464200 | -      | 1.44E-03                 | zinc finger CCCH domain-containing protein, putative        |
| PF3D7_1205800 | -      | 1.45E-03                 | high mobility group protein B3, putative                    |
| PF3D7_1122700 | -      | 1.46E-03                 | conserved Plasmodium protein, unknown function              |
| PF3D7_0526600 | -      | 1.46E-03                 | conserved Plasmodium protein, unknown function              |
| PF3D7_0623400 | -      | 1.49E-03                 | MEI2-like RNA-binding protein                               |
| PF3D7_1459000 | -      | 1.53E-03                 | ATP-dependent RNA helicase DBP5                             |
| PF3D7_1454800 | -      | 1.54E-03                 | conserved Plasmodium protein, unknown function              |
| PF3D7_0223300 | -      | 1.58E-03                 | erythrocyte membrane protein 1 (PfEMP1), exon 2             |
| PF3D7_1405200 | -      | 1.61E-03                 | trafficking protein particle complex subunit 1, putative    |
| PF3D7_1002100 | -      | 1.65E-03                 | EMP1-trafficking protein                                    |
| PF3D7_0507700 | -      | 1.69E-03                 | nuclear protein localization protein 4, putative (NPL4)     |
| PF3D7_1240400 | -      | 1.70E-03                 | erythrocyte membrane protein 1, PfEMP1                      |
| PF3D7_1410400 | -      | 1.71E-03                 | roptry-associated protein 1 (RAP1)                          |
| PF3D7_1427600 | -      | 1.77E-03                 | CorA-like Mg2 transporter protein, putative                 |
| PF3D7_0402400 | -      | 2.44E-03                 | Plasmodium exported protein, unknown function               |

**Table C: Table of top 50 identified Pf-specific antigens from the whole proteome antibody profile evaluated by ESPY at post-immunization.** Here, the top 25 Pf-specific antigens associated for the protection state and the top 25 Pf-specific antigens associated for the non-protected state evaluated based on their ESPY ([d\_norm]) value are listed. The effect of the evaluated Pf-specific antigen for the classification of protected versus non-protected individuals is defined by the respectively effect symbol, where '+' denotes a positive and '-' denotes a negative effect.

| Plasmodb ID   | effect | ESPY value (d_norm) | Description                                                           |
|---------------|--------|---------------------|-----------------------------------------------------------------------|
| PFSPZ dosis   | +      | 5.39E-01            | PFSPZ dosis                                                           |
| PF3D7_1123200 | +      | 6.46E-04            | leucine-rich repeat protein                                           |
| PFC0210c      | +      | 3.77E-04            | circumsporozoite (CS) protein (CSP)                                   |
| PF3D7_1243900 | +      | 3.08E-04            | double C2-like domain-containing protein                              |
| PF3D7_0210200 | +      | 2.52E-04            | conserved Plasmodium protein, unknown function                        |
| PF3D7_1227200 | +      | 1.75E-04            | potassium channel K1                                                  |
| PF3D7_1329500 | +      | 1.68E-04            | conserved Plasmodium protein, unknown function                        |
| PF3D7_0815500 | +      | 1.52E-04            | conserved Plasmodium protein, unknown function                        |
| PF3D7_0628100 | +      | 1.44E-04            | HECT-domain (ubiquitin-transferase), putative                         |
| PF3D7_1138400 | +      | 1.08E-04            | guanylyl cyclase (GCalpha)                                            |
| PF3D7_1036400 | +      | 1.04E-04            | liver stage antigen 1 (LSA1)                                          |
| PF3D7_1332900 | +      | 8.53E-05            | isoleucine-tRNA ligase, putative                                      |
| PF3D7_1035300 | +      | 3.87E-05            | glutamate-rich protein GLURP                                          |
| PF3D7_0623400 | -      | 1.44E-03            | MEI2-like RNA-binding protein                                         |
| PF3D7_1107300 | -      | 1.45E-03            | polyadenylate-binding protein-interacting protein 1, putative (PAIP1) |
| PF3D7_1464200 | -      | 1.45E-03            | zinc finger CCCH domain-containing protein, putative                  |
| PF3D7_1402400 | -      | 1.45E-03            | Zinc finger protein, putative                                         |
| PF3D7_1431900 | -      | 1.45E-03            | inner membrane complex suture component, putative                     |
| PF3D7_1411400 | -      | 1.46E-03            | cytoadherence linked asexual protein 9 (CLAG9)                        |
| PF3D7_0935800 | -      | 1.46E-03            | sphingomyelin synthase, putative                                      |
| PF3D7_0625100 | -      | 1.47E-03            | 60S ribosomal protein L23, putative                                   |
| PF3D7_1331800 | -      | 1.47E-03            | heptatricopeptide repeat-containing protein, putative                 |
| PF3D7_1221500 | -      | 1.48E-03            | erythrocyte membrane protein 1 (PfEMP1), truncated                    |
| PF3D7_0223300 | -      | 1.48E-03            | inositol-phosphate phosphatase, putative                              |
| PF3D7_0705500 | -      | 1.49E-03            | erythrocyte membrane protein 1, PfEMP1 (VAR)                          |
| PF3D7_0711700 | -      | 1.50E-03            | conserved Plasmodium protein, unknown function                        |
| PF3D7_1328300 | -      | 1.51E-03            | conserved Plasmodium protein, unknown function                        |
| PF3D7_1449800 | -      | 1.51E-03            | leucine-rich repeat protein                                           |
| PF3D7_1468300 | -      | 1.52E-03            | high mobility group protein B3, putative                              |
| PF3D7_1205800 | -      | 1.52E-03            | conserved Plasmodium protein, unknown function                        |
| PF3D7_0507700 | -      | 1.52E-03            | nuclear protein localization protein 4, putative (NPL4)               |
| PF3D7_1454800 | -      | 1.54E-03            | conserved Plasmodium protein, unknown function                        |
| PFE1590w      | -      | 1.56E-03            | early transcribed membrane protein 5 (ETRAPM5)                        |
| PF3D7_0823900 | -      | 1.57E-03            | dicarboxylate/tricarboxylate carrier (DTC)                            |
| PF3D7_1228700 | -      | 1.57E-03            | conserved Plasmodium protein, unknown function                        |
| PF3D7_0223300 | -      | 1.58E-03            | erythrocyte membrane protein 1 (PfEMP1), exon 2                       |
| PF3D7_1329500 | -      | 1.58E-03            | conserved Plasmodium protein, unknown function                        |
| PF3D7_1422700 | -      | 1.60E-03            | conserved Plasmodium protein, unknown function                        |
| PF3D7_1450800 | -      | 1.64E-03            | conserved Plasmodium protein, unknown function                        |
| PF3D7_0526600 | -      | 1.64E-03            | conserved Plasmodium protein, unknown function                        |
| PF3D7_1405200 | -      | 1.66E-03            | trafficking protein particle complex subunit 1, putative              |
| PF3D7_0909700 | -      | 1.68E-03            | FHA domain protein, putative                                          |
| PF3D7_1427600 | -      | 1.68E-03            | CorA-like Mg2 transporter protein, putative                           |
| PF3D7_1448700 | -      | 1.69E-03            | HSP20-like chaperone, putative                                        |
| PF3D7_0715300 | -      | 1.70E-03            | calcium/calmodulin-dependent protein kinase, putative                 |
| PF3D7_1240400 | -      | 1.72E-03            | erythrocyte membrane protein 1, PfEMP1                                |
| PF3D7_1410400 | -      | 1.76E-03            | rhoptyry-associated protein 1 (RAP1)                                  |
| PF3D7_1360400 | -      | 1.77E-03            | conserved Plasmodium protein, unknown function                        |
| PF3D7_1123400 | -      | 1.85E-03            | eukaryotic peptide chain release factor GTP-binding subunit, putative |
| PF3D7_1002100 | -      | 1.91E-03            | EMP1-trafficking protein                                              |
| PF3D7_0402400 | -      | 2.23E-03            | Plasmodium exported protein, unknown function (GEXP18)                |

**Table D: Table of top 50 identified Pf-specific antigens based on ESPY value from the whole proteome antibody at pre-CHMI.** Here, the 12 Pf-specific antigen associated for the protection state and the top 38 Pf-specific antigens associated for the non-protected state evaluated based on their ESPY (d\_norm) value are listed. The effect of the evaluated Pf-specific antigen for the classification of protected versus non-protected individuals is defined by the respectively effect symbol, where '+' denotes a positive and '-' denotes a negative effect. The top 12 of the positive associated and the top 38 of the negative associated Pf-specific antigens were selected based on the maximum |d\_norm| value.

| Plasmodb ID   | effect | ESPY value ( d norm ) | Description                                             |
|---------------|--------|-----------------------|---------------------------------------------------------|
| PFSPZ dosis   | +      | 6.37E-01              | PFSPZ dosis                                             |
| PF3D7_0712300 | +      | 1.96E-03              | erythrocyte membrane protein 1, PfEMP1                  |
| PF3D7_1101200 | +      | 1.96E-03              | rifin                                                   |
| PF3D7_0223100 | +      | 1.82E-03              | rifin                                                   |
| PF3D7_0911300 | +      | 1.51E-03              | cysteine repeat modular protein 1 (CRMP1)               |
| PF3D7_1300100 | +      | 1.32E-03              | erythrocyte membrane protein 1, PfEMP1                  |
| PFB0300c      | +      | 1.25E-03              | merozoite surface protein 2 (MSP2)                      |
| PF3D7_1201400 | +      | 1.10E-03              | Plasmodium exported protein, unknown function           |
| PF3D7_0601100 | +      | 1.09E-03              | exported protein family 3                               |
| PF3D7_1464500 | +      | 9.82E-04              | conserved Plasmodium membrane protein, unknown function |
| PF3D7_1206900 | +      | 6.18E-04              | conserved Plasmodium protein, unknown function          |
| PF3D7_1349700 | +      | 6.10E-04              | peptidase, putative                                     |
| PF3D7_1448300 | +      | 5.67E-04              | conserved Plasmodium protein, unknown function          |
| PF3D7_0804500 | +      | 5.03E-04              | conserved Plasmodium membrane protein, unknown function |
| PF3D7_1136200 | +      | 4.79E-04              | asparagine-rich merozoite protein ARMA                  |
| PF3D7_0704700 | +      | 4.39E-04              | phosphopantetheine adenylyltransferase, putative        |
| PF3D7_0725100 | +      | 4.23E-04              | conserved Plasmodium membrane protein, unknown function |
| PF3D7_1447800 | +      | 4.00E-04              | conserved Plasmodium protein, unknown function          |
| PF3D7_1233400 | +      | 3.44E-04              | conserved Plasmodium membrane protein, unknown function |
| PF3D7_0900500 | +      | 2.97E-04              | rifin                                                   |
| PF3D7_1459600 | +      | 2.54E-04              | AP-4 complex accessory subunit Tepsin, putative         |
| PF3D7_0714300 | +      | 2.53E-04              | zinc finger protein, putative                           |
| PF3D7_0614900 | +      | 2.33E-04              | conserved Plasmodium membrane protein, unknown function |
| PF3D7_1436100 | +      | 1.95E-04              | conserved Plasmodium membrane protein, unknown function |
| PF3D7_0532500 | +      | 1.23E-04              | Plasmodium exported protein, unknown function           |
| PF3D7_1016500 | +      | 1.06E-04              | Plasmodium exported protein (PHISTc), unknown function  |
| PF3D7_1149200 | -      | 3.37E-03              | ring-infected erythrocyte surface antigen               |
| PF3D7_1202300 | -      | 3.38E-03              | dynein heavy chain, putative                            |
| PF3D7_1233400 | -      | 3.40E-03              | conserved Plasmodium membrane protein, unknown function |
| PF3D7_0711700 | -      | 3.50E-03              | erythrocyte membrane protein 1, PfEMP1 (VAR)            |
| PF3D7_1001800 | -      | 3.61E-03              | Plasmodium exported protein (PHISTc), unknown function  |
| PF3D7_1209300 | -      | 3.63E-03              | telomere repeat-binding zinc finger protein             |
| PF3D7_1474600 | -      | 3.65E-03              | vacuole membrane protein 1, putative                    |
| PF3D7_0410800 | -      | 3.65E-03              | conserved Plasmodium protein, unknown function          |
| PF3D7_1478100 | -      | 3.67E-03              | Plasmodium exported protein (hyp13), unknown function   |
| PF3D7_1208800 | -      | 3.73E-03              | zinc finger protein, putative                           |
| PF3D7_0108300 | -      | 3.77E-03              | conserved Plasmodium protein, unknown function          |
| PF3D7_1351300 | -      | 3.80E-03              | conserved Plasmodium membrane protein, unknown function |
| PF3D7_1318000 | -      | 3.86E-03              | conserved Plasmodium membrane protein, unknown function |
| PF3D7_0713900 | -      | 3.99E-03              | conserved Plasmodium protein, unknown function          |
| PF3D7_1240400 | -      | 4.00E-03              | erythrocyte membrane protein 1, PfEMP1                  |
| PF3D7_0223300 | -      | 4.20E-03              | erythrocyte membrane protein 1 (PfEMP1), exon2          |
| PF3D7_0525800 | -      | 4.25E-03              | inner membrane complex protein 1g                       |
| PF3D7_1016600 | -      | 4.41E-03              | Plasmodium exported protein, unknown function           |
| PF3D7_1419400 | -      | 4.44E-03              | conserved Plasmodium membrane protein, unknown function |
| PF3D7_1459600 | -      | 4.67E-03              | conserved Plasmodium protein, unknown function          |
| PF3D7_0718700 | -      | 5.17E-03              | conserved Plasmodium membrane protein, unknown function |
| PF3D7_0818500 | -      | 5.34E-03              | zinc finger protein, putative                           |
| PF3D7_0424800 | -      | 5.51E-03              | Plasmodium exported protein (PHISTb), unknown function  |
| PF3D7_0935600 | -      | 6.60E-03              | gametocytogenesis-implicated protein (GIG)              |
| PF3D7_0402400 | -      | 8.74E-03              | Plasmodium exported protein, unknown function (GEXP18)  |

**Table E: Table of top 50 identified Pf-specific antigens based on ESPY value from the proteome antibody profile of pre-selected cell-surface antigens at post-immunization.** Here, the top 25 Pf-specific antigens associated for the protection state and the top 25 Pf-specific antigens associated for the non-protected state evaluated based on their ESPY (|d norm|) value are listed. The effect of the evaluated Pf-specific antigen for the classification of protected versus non-protected individuals is defined by the respectively effect symbol, where '+' denotes a positive and '-' denotes a negative effect.



| Plasmodb ID   | effect | ESPY value ( d_norm ) | Description                                                 |
|---------------|--------|-----------------------|-------------------------------------------------------------|
| PFSPZ dosis   | +      | 7.87E-01              | PFSPZ dosis                                                 |
| PFC0210c      | +      | 4.85E-04              | circumsporozoite (CS) protein (CSP)                         |
| PFB0300c      | +      | 3.60E-04              | merozoite surface protein 2 (MSP2)                          |
| PF3D7_0630600 | +      | 3.05E-04              | conserved Plasmodium protein, unknown function              |
| PF3D7_1240900 | +      | 2.75E-04              | erythrocyte membrane protein 1, PfEMP1                      |
| PF3D7_1036400 | +      | 1.43E-04              | liver stage antigen 1 (LSA1)                                |
| PF3D7_0804500 | +      | 9.64E-05              | conserved Plasmodium membrane protein, unknown function     |
| PF3D7_1448300 | +      | 6.51E-05              | conserved Plasmodium protein, unknown function              |
| PF3D7_1370300 | -      | 1.59E-03              | membrane associated histidine-rich protein (MAHRP1)         |
| PF3D7_0704700 | -      | 1.63E-03              | conserved Plasmodium membrane protein, unknown function     |
| PF3D7_1415500 | -      | 1.63E-03              | conserved Plasmodium membrane protein, unknown function     |
| PF3D7_1436100 | -      | 1.65E-03              | conserved Plasmodium membrane protein, unknown function     |
| PF3D7_0713900 | -      | 1.65E-03              | conserved Plasmodium protein, unknown function              |
| PF3D7_1467000 | -      | 1.66E-03              | conserved Plasmodium membrane protein, unknown function     |
| PF3D7_1150300 | -      | 1.66E-03              | rifin                                                       |
| PF3D7_0712800 | -      | 1.67E-03              | erythrocyte membrane protein 1, PfEMP1                      |
| PF3D7_1365700 | -      | 1.69E-03              | SNARE associated Golgi protein, putative                    |
| PF3D7_0600300 | -      | 1.70E-03              | rifin                                                       |
| PF3D7_1301600 | -      | 1.71E-03              | erythrocyte binding antigen-140                             |
| PF3D7_0400400 | -      | 1.71E-03              | erythrocyte membrane protein 1, PfEMP1                      |
| PF3D7_0731200 | -      | 1.72E-03              | Plasmodium exported protein, unknown function               |
| PF3D7_1373000 | -      | 1.72E-03              | rifin                                                       |
| PF3D7_1001800 | -      | 1.72E-03              | Plasmodium exported protein (PHISTc), unknown function      |
| PF3D7_0200600 | -      | 1.72E-03              | rifin                                                       |
| PF3D7_1202300 | -      | 1.73E-03              | dynein heavy chain, putative                                |
| PF3D7_0936600 | -      | 1.78E-03              | gametocyte exported protein 5                               |
| PF3D7_1202300 | -      | 1.81E-03              | dynein heavy chain, putative                                |
| PF13_0197     | -      | 1.81E-03              | merozoite surface protein 7 (MSP7)                          |
| PF3D7_1135300 | -      | 1.84E-03              | conserved Plasmodium membrane protein, unknown function     |
| PF3D7_0912200 | -      | 1.86E-03              | conserved Plasmodium membrane protein, unknown function     |
| PF3D7_0410800 | -      | 1.90E-03              | conserved Plasmodium protein, unknown function              |
| PF3D7_1324300 | -      | 1.96E-03              | conserved Plasmodium membrane protein, unknown function     |
| PF3D7_1300200 | -      | 1.97E-03              | rifin                                                       |
| PF3D7_0223300 | -      | 1.97E-03              | erythrocyte membrane protein 1 (PfEMP1), truncated          |
| PF3D7_0718700 | -      | 1.98E-03              | conserved Plasmodium membrane protein, unknown function     |
| PF3D7_1248300 | -      | 2.00E-03              | conserved Plasmodium membrane protein, unknown function     |
| PF3D7_1347300 | -      | 2.01E-03              | conserved Plasmodium membrane protein, unknown function     |
| PFE1590w      | -      | 2.02E-03              | early transcribed membrane protein 5 (ETRAPM5)              |
| PF3D7_0525800 | -      | 2.04E-03              | inner membrane complex protein 1g                           |
| PF3D7_0832300 | -      | 2.07E-03              | Plasmodium exported protein (PHISTa-like), unknown function |
| PF3D7_1479400 | -      | 2.07E-03              | rifin                                                       |
| PF3D7_0730900 | -      | 2.11E-03              | Plasmodium exported protein, unknown function               |
| PF3D7_1149200 | -      | 2.12E-03              | ring-infected erythrocyte surface antigen                   |
| PF3D7_0712000 | -      | 2.14E-03              | erythrocyte membrane protein 1, PfEMP1                      |
| PF3D7_0935600 | -      | 2.15E-03              | gametocytogenesis-implicated protein (GIG)                  |
| PF3D7_0223300 | -      | 2.16E-03              | erythrocyte membrane protein 1 (PfEMP1), exon 2             |
| PF3D7_0818500 | -      | 2.17E-03              | zinc finger protein, putative                               |
| PF3D7_1229000 | -      | 2.23E-03              | conserved Plasmodium membrane protein, unknown function     |
| PF3D7_0424800 | -      | 2.28E-03              | Plasmodium exported protein (PHISTb), unknown function      |
| PF3D7_1240400 | -      | 2.31E-03              | erythrocyte membrane protein 1, PfEMP1                      |
| PF3D7_0402400 | -      | 3.23E-03              | Plasmodium exported protein, unknown function (GEXP18)      |

**Table F: Table of top 50 identified Pf-specific antigens based on ESPY value from the proteome antibody profile of pre-selected cell-surface antigens at pre-CHMI.** Here, seven Pf-specific antigens associated for the protection state and the top 43 Pf-specific antigens associated for the non-protected state evaluated based on their ESPY (|d\_norm|) value are listed. The effect of the evaluated Pf-specific antigen for the classification of protected versus non-protected individuals is defined by the respectively effect symbol, where '+' denotes a positive and '-' denotes a negative effect.
